# Supplementary material for: The core triacylglycerol toolbox in woody oil plants reveals targets for oil production bioengineering
Source: Front Plant Sci. 2023 Apr 3;14:1170723. doi: 10.3389/fpls.2023.1170723 (PMC10106636; doi:10.3389/fpls.2023.1170723)
Supplement: Supplementary Table 1 — Identification of TAG-related biosynthesis genes in woody oil plants [file Table_1.xlsx]

## Sheet: Sheet1
Gene ID	Gene model	Chromosome	Strand	5'end	3'end
AtePDCT1	Atru.chr1.2949	chr1	+	48490710	48494038
AtrCPT1	Atru.chr11.1449	chr11	-	26227950	26235022
AtrCPT2	Atru.chr11.1479	chr11	-	26600867	26607939
AtrDGAT1	Atru.chr3.20	chr3	-	142716	146705
AtrDGAT2	Atru.chr3.90	chr3	-	803398	804846
AtrDGAT3	Atru.chr4.3177	chr4	+	49099568	49100634
AtrDGAT4	Atru.chr5.865	chr5	-	8409776	8411229
AtrDGAT5	Atru.chr7.1627.3	chr7	-	33032904	33041875
AtrDGAT6	Atru.chr10.2124	chr10	+	36269795	36277305
AtrG3PAT1	Atru.chr5.506	chr5	+	5217421	5219773
AtrG3PAT2	Atru.chr5.950	chr5	-	9124816	9186697
AtrG3PAT3	Atru.chr5.955	chr5	-	9273645	9276888
AtrG3PAT4	Atru.chr5.3499	chr5	-	47860045	47865648
AtrG3PAT5	Atru.chr6.1525	chr6	+	25192081	25201122
AtrG3PAT6	Atru.chr6.2089	chr6	+	31847150	31849463
AtrG3PAT7	Atru.chr8.2214	chr8	-	36784748	36787511
AtrG3PAT8	Atru.chr12.413	chr12	+	5409385	5411674
AtrG3PAT9	Atru.chr13.1290	chr13	+	12639273	12641795
AtrPAP1	Atru.chr1.1610	chr1	-	24096798	24101166
AtrPAP10	Atru.chr11.257	chr11	+	3518894	3523874
AtrPAP11	Atru.chr11.262	chr11	+	3560420	3565975
AtrPAP12	Atru.chr11.282	chr11	+	3802058	3804480
AtrPAP13	Atru.chr13.657	chr13	+	5486175	5495211
AtrPAP2	Atru.chr3.630	chr3	-	6618512	6621222
AtrPAP3	Atru.chr5.2634	chr5	-	37152270	37153414
AtrPAP4	Atru.chr8.1200	chr8	-	25490756	25494487
AtrPAP5	Atru.chr8.2498.1	chr8	-	39298642	39304924
AtrPAP6	Atru.chr9.1343	chr9	+	28464325	28466739
AtrPAP7	Atru.chr11.249	chr11	+	3420132	3424250
AtrPAP8	Atru.chr11.251	chr11	+	3441933	3446912
AtrPAP9	Atru.chr11.255	chr11	+	3497370	3501486
AtrPDAT1	Atru.chr1.3901	chr1	-	66586975	66590758
AtrPDAT2	Atru.chr7.1660.1	chr7	-	33377262	33384230
AtuLPAAT1	Atru.chr1.1035	chr1	-	15508915	15514128
AtuLPAAT2	Atru.chr3.2745	chr3	+	47948812	47955123
AtuLPAAT3	Atru.chr5.2938	chr5	+	40648693	40649175
AtuLPAAT4	Atru.chr5.2939	chr5	+	40649186	40651718
AtuLPAAT5	Atru.chr7.37.1	chr7	+	1767723	1771715
AtuLPAAT6	Atru.chr13.550	chr13	-	4356219	4364667
EguCPT1	p5.00_sc00014_p0137	EG_Chr12	-	19484598	19490876
EguCPT2	p5.00_sc00013_p0216	EG_Chr16	-	20878721	20879738
EguCPT3	p5.00_sc00331_p0007	p5_sc00331	+	781822	786243
EguDGAT1	p5.00_sc00001_p0089	EG_Chr3	-	6084493	6116077
EguDGAT2	p5.00_sc00018_p0148	EG_Chr6	+	41618209	41625095
EguDGAT3	p5.00_sc00039_p0142	EG_Chr7	-	3534613	3551575
EguDGAT4	p5.00_sc00004_p0061	EG_Chr10	+	19679038	19688153
EguDGAT5	p5.00_sc00147_p0019	EG_Chr11	-	2587414	2595227
EguDGAT6	p5.00_sc00850_p0003	p5_sc00850	+	127327	131473
EguG3PAT1	p5.00_sc00043_p0040	EG_Chr2	+	12481982	12487292
EguG3PAT10	p5.00_sc00033_p0202	EG_Chr14	-	6182899	6184637
EguG3PAT11	p5.00_sc00017_p0169	EG_Chr16	-	2649375	2653653
EguG3PAT12	p5.00_sc00213_p0016	p5_sc00213	+	399811	408747
EguG3PAT13	p5.00_sc00335_p0026	p5_sc00335	+	637749	650652
EguG3PAT14	p5.00_sc00774_p0005	p5_sc00774	-	204836	208698
EguG3PAT2	p5.00_sc00025_p0112	EG_Chr2	+	60988899	60989324
EguG3PAT3	p5.00_sc00007_p0226	EG_Chr5	-	10997479	11001778
EguG3PAT4	p5.00_sc00084_p0005	EG_Chr5	-	51695811	51727731
EguG3PAT5	p5.00_sc00167_p0007	EG_Chr6	-	32630969	32640193
EguG3PAT6	p5.00_sc00009_p0116	EG_Chr10	-	16165154	16166023
EguG3PAT7	p5.00_sc00009_p0115	EG_Chr10	-	16176761	16182188
EguG3PAT8	p5.00_sc00074_p0098	EG_Chr10	-	31765545	31768948
EguG3PAT9	p5.00_sc00002_p0512	EG_Chr11	+	14518720	14521762
EguLPAAT1	p5.00_sc00351_p0003	EG_Chr9	+	13867846	13869177
EguLPAAT2	p5.00_sc00002_p0463	EG_Chr11	-	15795380	15797090
EguLPAAT3	p5.00_sc00234_p0004	p5_sc00234	-	193094	198497
EguLPAAT4	p5.00_sc00358_p0005	p5_sc00358	-	342557	370036
EguLPAAT5	p5.00_sc01858_p0001	p5_sc01858	-	37149	50792
EguPAP1	p5.00_sc00027_p0143	EG_Chr1	-	36897993	36899891
EguPAP10	p5.00_sc00031_p0154	EG_Chr7	+	15056388	15059025
EguPAP11	p5.00_sc00031_p0090	EG_Chr7	-	16842932	16845638
EguPAP12	p5.00_sc00002_p0240	EG_Chr11	+	21848319	21849016
EguPAP13	p5.00_sc00033_p0240	EG_Chr14	+	7041808	7044665
EguPAP14	p5.00_sc00036_p0182	EG_Chr15	-	22955657	22960826
EguPAP15	p5.00_sc00315_p0006	p5_sc00315	-	224772	236638
EguPAP2	p5.00_sc00001_p0806	EG_Chr3	+	21780099	21786522
EguPAP3	p5.00_sc00001_p0807	EG_Chr3	+	21789116	21800048
EguPAP4	p5.00_sc00001_p0892	EG_Chr3	-	23813545	23819839
EguPAP5	p5.00_sc00023_p0007	EG_Chr4	+	43522768	43523345
EguPAP6	p5.00_sc00121_p0021	EG_Chr5	-	4846005	4850409
EguPAP7	p5.00_sc00003_p0106	EG_Chr5	+	47529514	47537839
EguPAP8	p5.00_sc00061_p0001	EG_Chr6	+	28163719	28165765
EguPAP9	p5.00_sc00031_p0159	EG_Chr7	+	14905092	14916778
EguPDAT1	p5.00_sc00099_p0118	EG_Chr14	-	2056070	2057252
EguPDCT1	p5.00_sc00001_p0866	EG_Chr3	-	23371639	23372656
JatCPT1	Jatcu.06g000828	chr6	+	10036597	10049676
JatCPT2	Jatcu.11g001023	chr11	-	8403619	8405317
JatCPT3	Jatcu.11g001024	chr11	-	8406742	8407844
JatDGAT1	Jatcu.04g000511	chr4	+	2569705	2576364
JatDGAT2	Jatcu.09g000659	chr9	-	3500917	3502083
JatPDAT1	Jatcu.04g000545	chr4	-	2766590	2772906
JatPDAT2	Jatcu.U002195	scaffold76	+	225405	228770
JatPDCT1	Jatcu.05g001844	chr5	+	24470227	24472046
JcuG3PAT1	Jatcu.01g001687	chr1	-	15394634	15399361
JcuG3PAT10	Jatcu.09g000337	chr9	+	1952078	1954505
JcuG3PAT11	Jatcu.09g000720	chr9	-	3786514	3788297
JcuG3PAT12	Jatcu.U003353	scaffold156	-	458678	461062
JcuG3PAT2	Jatcu.01g001689	chr1	-	15412591	15414376
JcuG3PAT3	Jatcu.01g001690	chr1	-	15424759	15425046
JcuG3PAT4	Jatcu.02g000914	chr2	-	13475980	13479369
JcuG3PAT5	Jatcu.02g002004	chr2	-	20856343	20857745
JcuG3PAT6	Jatcu.05g001040	chr5	+	14390793	14397305
JcuG3PAT7	Jatcu.07g001047	chr7	+	6038593	6040564
JcuG3PAT8	Jatcu.07g001049	chr7	+	6044508	6045026
JcuG3PAT9	Jatcu.07g001050	chr7	+	6045843	6046763
JcuLPAAT1	Jatcu.01g002299	chr1	+	19246657	19250615
JcuLPAAT2	Jatcu.04g001055	chr4	+	5966132	5967237
JcuLPAAT3	Jatcu.06g000591	chr6	-	7904324	7910543
JcuLPAAT4	Jatcu.06g001924	chr6	+	15814022	15815551
JcuLPAAT5	Jatcu.07g000438	chr7	-	2218701	2224175
JcuPAP1	Jatcu.02g000143	chr2	-	2644720	2648971
JcuPAP10	Jatcu.U000666	scaffold35	+	4300154	4307332
JcuPAP11	Jatcu.U001263	scaffold41	-	1341054	1341944
JcuPAP2	Jatcu.06g000423	chr6	-	6429957	6434406
JcuPAP3	Jatcu.06g000424	chr6	-	6437856	6440664
JcuPAP4	Jatcu.07g000540	chr7	+	2785662	2793038
JcuPAP5	Jatcu.07g000541	chr7	+	2797148	2804705
JcuPAP6	Jatcu.09g001746	chr9	+	9441693	9443206
JcuPAP7	Jatcu.11g000515	chr11	+	2948839	2953192
JcuPAP8	Jatcu.11g000667	chr11	-	4548845	4553347
JcuPAP9	Jatcu.11g000668	chr11	-	4557886	4560890
JreCPT1	JreChr05G10022	chr5	-	10202531	10219220
JreCPT2	JreChr06G10761	chr6	+	22172744	22181730
JreDGAT1	JreChr01G10590	chr1	+	17807167	17809067
JreDGAT2	JreChr03G11911	chr3	+	35489764	35498736
JreDGAT3	JreChr04G11043	chr4	+	26145853	26152196
JreDGAT4	JreChr07G10194	chr7	+	129	5403
JreDGAT5	JreChr11G11550	chr11	-	32238213	32238776
JreG3PAT1	JreChr01G13821	chr1	+	7775803	7778770
JreG3PAT2	JreChr01G13321	chr1	-	49985341	49987233
JreG3PAT3	JreChr02G11680	chr2	-	27810542	27812144
JreG3PAT4	JreChr06G11790	chr6	+	3677537	3679203
JreG3PAT5	JreChr07G11072	chr7	+	25931825	25933363
JreG3PAT6	JreChr09G11568	chr9	-	31262700	31263563
JreG3PAT7	JreChr09G11589	chr9	-	31592664	31595487
JreG3PAT8	JreChr10G11401	chr10	-	31023972	31026911
JreG3PAT9	JreChr11G10907	chr11	+	25734326	25771072
JreLPAAT1	JreChr05G12419	chr5	+	5029151	5033775
JreLPAAT2	JreChr10G11158	chr10	-	2821516	2828491
JreLPAAT3	JreChr13G11073	chr13	+	25570667	25576129
JreLPAAT4	JreChr13G11075	chr13	+	25591399	25595733
JreLPAAT5	JreChr14G10907	chr14	+	23132328	23139373
JreLPAAT6	JreChr15G10128	chr15	+	12097096	12099403
JreLPAAT7	JreChr15G11526	chr15	+	34237941	34239192
JrePAP1	JreChr01G13562	chr1	-	5190095	5193431
JrePAP10	JreChr10G10784	chr10	+	2240103	2242702
JrePAP11	JreChr10G11127	chr10	-	27878682	27879359
JrePAP12	JreChr10G11204	chr10	+	28876420	28890896
JrePAP13	JreChr12G11145	chr12	+	22534017	22534628
JrePAP14	JreChr15G12261	chr15	-	9474519	9482582
JrePAP2	JreChr02G11860	chr2	-	3023043	3027029
JrePAP3	JreChr03G12969	chr3	+	5374929	5379464
JrePAP4	JreChr05G11972	chr5	+	36093522	36096709
JrePAP5	JreChr05G11973	chr5	+	36103375	36105850
JrePAP6	JreChr06G11638	chr6	-	2887172	2889660
JrePAP7	JreChr06G11643	chr6	-	2893893	2898605
JrePAP8	JreChr09G10921	chr9	+	2294295	2297172
JrePAP9	JreChr09G11168	chr9	-	26747095	26747757
JrePDAT1	JreChr03G11870	chr3	+	35054262	35065490
JrePDAT2	JreChr04G10999	chr4	-	25539086	25544735
JrePDAT3	JreChr13G10859	chr13	+	23156189	23176989
JrePDCT1	JreChr01G12809	chr1	-	45985290	45986731
OeuCPT1	Oeu054562.1	chr6	+	25014065	25021078
OeuCPT2	Oeu024129.1	chr8	+	15565852	15573776
OeuCPT3	Oeu054835.1	chr9	+	4866298	4877533
OeuDGAT1	Oeu045756.1	chr10	-	12279389	12281760
OeuDGAT2	Oeu012285.1	chr13	+	7074505	7076215
OeuDGAT3	Oeu051295.1	chr17	-	11966433	11977769
OeuDGAT4	Oeu032802.1	scaffold2743	-	9312	17259
OeuG3PAT1	Oeu039026.1	chr1	-	24335243	24337174
OeuG3PAT10	Oeu020057.1	chr21	-	18151270	18152606
OeuG3PAT11	Oeu027094.2	scaffold227	+	390568	418627
OeuG3PAT12	Oeu024623.1	scaffold2116	+	144647	147236
OeuG3PAT2	Oeu039027.1	chr1	-	24338275	24340206
OeuG3PAT3	Oeu030515.1	chr2	+	19774762	19777718
OeuG3PAT4	Oeu051847.1	chr3	-	20448584	20452830
OeuG3PAT5	Oeu040039.1	chr6	-	3392421	3394221
OeuG3PAT6	Oeu009500.1	chr12	-	18591814	18593718
OeuG3PAT7	Oeu000060.1	chr15	+	3674409	3678843
OeuG3PAT8	Oeu036599.1	chr16	-	2953235	2955168
OeuG3PAT9	Oeu015021.1	chr17	-	14318542	14321659
OeuLPAAT1	Oeu014324.1	chr15	-	26279824	26282170
OeuLPAAT2	Oeu033777.1	chr17	+	400074	407480
OeuLPAAT3	Oeu054273.3	chr17	-	1538983	1544547
OeuLPAAT4	Oeu064320.2	scaffold973	-	138021	144615
OeuLPAAT5	Oeu025450.1	scaffold2179	+	22823	27636
OeuPAP1	Oeu063855.2	chr2	+	27925132	27928692
OeuPAP10	Oeu000992.1	chr10	+	42366690	42368543
OeuPAP11	Oeu035170.1	chr11	+	32520908	32532690
OeuPAP12	Oeu007691.1	chr12	+	7205481	7206110
OeuPAP13	Oeu042243.1	chr17	+	22712351	22712885
OeuPAP14	Oeu029419.1	chr17	-	24572008	24577187
OeuPAP15	Oeu013272.1	chr18	-	4285054	4285971
OeuPAP16	Oeu012901.1	chr18	+	16523995	16524321
OeuPAP17	Oeu060064.3	scaffold83	-	933444	942487
OeuPAP18	Oeu057591.1	scaffold753	+	109335	113657
OeuPAP19	Oeu060090.1	scaffold83	+	1203073	1203750
OeuPAP2	Oeu044837.2	chr5	+	6909873	6933233
OeuPAP20	Oeu007190.2	scaffold1264	-	215003	222299
OeuPAP21	Oeu007191.1	scaffold1264	-	250513	255841
OeuPAP22	Oeu023876.1	scaffold2075	-	68964	80659
OeuPAP23	Oeu036846.1	scaffold3175	-	15	748
OeuPAP3	Oeu057763.2	chr6	+	27416512	27419438
OeuPAP4	Oeu053809.1	chr7	+	2483918	2494740
OeuPAP5	Oeu026497.1	chr8	-	1252430	1260218
OeuPAP6	Oeu048375.1	chr8	+	16239750	16246204
OeuPAP7	Oeu050387.1	chr10	+	7011875	7015001
OeuPAP8	Oeu027431.1	chr10	+	35707965	35711945
OeuPAP9	Oeu027432.1	chr10	+	35718461	35721723
OeuPDAT1	Oeu058718.1	chr10	-	22136359	22141225
OeuPDAT2	Oeu061167.1	chr10	+	29681870	29686284
OeuPDCT1	Oeu042081.1	chr10	+	19427791	19430581
OeuPDCT2	Oeu042085.1	chr10	+	19461919	19464066
OeuPDCT3	Oeu013862.1	chr21	-	13833215	13835227
OeuPDCT4	Oeu013866.1	chr21	-	13868824	13871773
OeuPDCT5	Oeu013867.1	chr21	-	13892476	13894263
VfoCPT1	Vf10G1365	Lachesis_group9	+	16058709	16065895
VfoDGAT1	Vf04G1154	Lachesis_group3	-	57387344	57390758
VfoDGAT2	Vf06G2248	Lachesis_group5	+	80718116	80719280
VfoDGAT3	Vf08G1595	Lachesis_group7	-	75018240	75026085
VfoDGAT4	Vf00G0378	Scaffold1636_ERROPOS183456	-	141062	141970
VfoG3PAT1	Vf02G1237	Lachesis_group1	+	66251757	66258392
VfoG3PAT2	Vf03G2021	Lachesis_group2	+	96745558	96747280
VfoG3PAT3	Vf05G0677	Lachesis_group4	-	49762817	49765056
VfoG3PAT4	Vf06G2184	Lachesis_group5	+	79980377	79982077
VfoG3PAT5	Vf06G2523	Lachesis_group5	-	83725192	83728085
VfoG3PAT6	Vf07G0289	Lachesis_group6	-	33060716	33104376
VfoG3PAT7	Vf07G2529	Lachesis_group6	-	80904098	80905831
VfoG3PAT8	Vf09G1129	Lachesis_group8	+	60651232	60654521
VfoG3PAT9	Vf00G0632	Scaffold20_ERROPOS3763363+	-	2000	5397
VfoLPAAT1	Vf04G0690	Lachesis_group3	-	13571626	13577152
VfoLPAAT2	Vf04G1723	Lachesis_group3	+	93035259	93037909
VfoLPAAT3	Vf08G0218	Lachesis_group7	-	3985931	3989921
VfoLPAAT4	Vf09G1785	Lachesis_group8	+	69300977	69308835
VfoLPAAT5	Vf10G0185	Lachesis_group9	-	2130636	2133754
VfoLPAAT6	Vf11G0346	Lachesis_group10	+	35959378	35965332
VfoPAP1	Vf04G0069	Lachesis_group3	+	557552	558223
VfoPAP10	Vf10G1546	Lachesis_group9	+	20771157	20774054
VfoPAP11	Vf00G0116	Scaffold1104_ERROPOS60603	+	12690	16700
VfoPAP2	Vf05G0486	Lachesis_group4	+	24063770	24066806
VfoPAP3	Vf05G0515	Lachesis_group4	+	28634026	28637149
VfoPAP4	Vf05G1092	Lachesis_group4	-	71089718	71097084
VfoPAP5	Vf05G1618	Lachesis_group4	-	81653092	81654413
VfoPAP6	Vf06G1275	Lachesis_group5	-	66133511	66146466
VfoPAP7	Vf09G1692	Lachesis_group8	-	68293474	68301365
VfoPAP8	Vf09G1693	Lachesis_group8	-	68308483	68316542
VfoPAP9	Vf10G1544	Lachesis_group9	+	20725826	20728952
VfoPDAT1	Vf02G0148	Lachesis_group1	+	2024786	2028495
VfoPDAT2	Vf02G2455	Lachesis_group1	-	103383646	103388958
VfoPDAT3	Vf08G1547	Lachesis_group7	+	74501583	74505538
VfoPDCT1	Vf02G1995	Lachesis_group1	+	95762098	95763617
XsoCPT1	EVM0019790.1	X.sor_LG12	-	331895	339882
XsoDGAT1	EVM0003862.1	X.sor_LG1	+	4693005	4698290
XsoDGAT2	EVM0020210.1	X.sor_LG6	+	26556695	26565957
XsoDGAT3	EVM0023600.1	X.sor_LG10	+	14136707	14143120
XsoG3PAT1	EVM0013092.1	X.sor_LG1	+	2503299	2505327
XsoG3PAT2	EVM0021636.1	X.sor_LG1	+	4267398	4270908
XsoG3PAT3	EVM0002765.1	X.sor_LG1	-	7062975	7065837
XsoG3PAT4	EVM0001696.1	X.sor_LG1	-	32017744	32031182
XsoG3PAT5	EVM0012975.1	X.sor_LG2	+	38761405	38767167
XsoG3PAT6	EVM0011157.1	X.sor_LG13	+	23925472	23928251
XsoG3PAT7	EVM0010381.1	X.sor_LG15	+	15436963	15438840
XsoLPAAT1	EVM0011639.1	X.sor_LG2	+	35046277	35050883
XsoLPAAT2	EVM0000153.2	X.sor_LG4	+	30755321	30759464
XsoLPAAT3	EVM0010207.1	X.sor_LG5	+	12118949	12122215
XsoLPAAT4	EVM0006877.1	X.sor_LG7	-	29753394	29758626
XsoLPAAT5	EVM0023524.1	X.sor_LG12	+	14835375	14840979
XsoLPAAT6	EVM0011741.1	ctg2508	-	25735	27350
XsoPAP1	EVM0024148.2	X.sor_LG4	-	29598520	29610152
XsoPAP10	EVM0004571.1	X.sor_LG13	+	26218268	26221293
XsoPAP11	EVM0017962.1	X.sor_LG13	-	27901436	27908125
XsoPAP2	EVM0010904.1	X.sor_LG8	-	31259751	31262915
XsoPAP3	EVM0012831.2	X.sor_LG8	-	31269136	31273908
XsoPAP4	EVM0024128.1	X.sor_LG8	-	31285445	31288747
XsoPAP5	EVM0000931.1	X.sor_LG10	+	18724805	18727509
XsoPAP6	EVM0001330.1	X.sor_LG11	+	23974823	23975604
XsoPAP7	EVM0006932.1	X.sor_LG11	+	23995933	23996514
XsoPAP8	EVM0006519.1	X.sor_LG13	-	15624735	15629665
XsoPAP9	EVM0018253.1	X.sor_LG13	+	26215811	26216476
XsoPDAT1	EVM0014790.1	X.sor_LG9	+	2189376	2195782
XSoPDCT1	EVM0007926.1	X.sor_LG9	-	13599736	13602841
